# Supplementary material for: Effect of aliovalent bismuth substitution on structure and optical properties of CsSnBr3
Source: Springer Nature journal article supplement (doi:10.1038/s42004-023-00874-w), 2023-04-19
Supplement: MOESM1 [file 42004_2023_874_MOESM1_ESM.pdf]

## **Supplemental Information**

### **Effect of aliovalent bismuth substitution on structure and optical properties of CsSnBr<sub>3</sub>**

Madhusudan Chaudhary, Abhoy Karmakar, Vidyanshu Mishra, Amit Bhattacharya, Dundappa Mumbaraddi, Arthur Mar, and Vladimir K. Michaelis\*

*Department of Chemistry, University of Alberta, Edmonton, Alberta T6G 2G2, Canada*

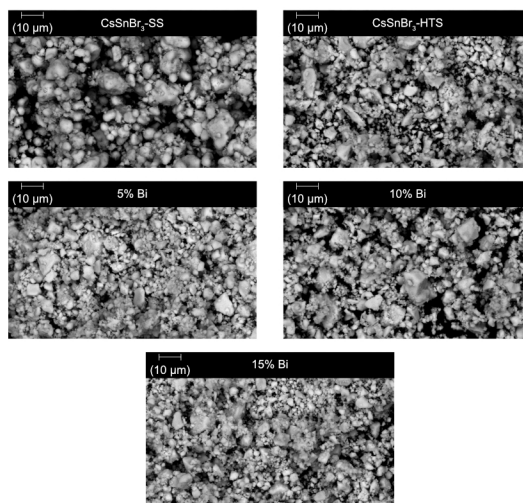

**Figure S1.** SEM images of CsSnBr<sub>3</sub> and Bi-substituted compounds.

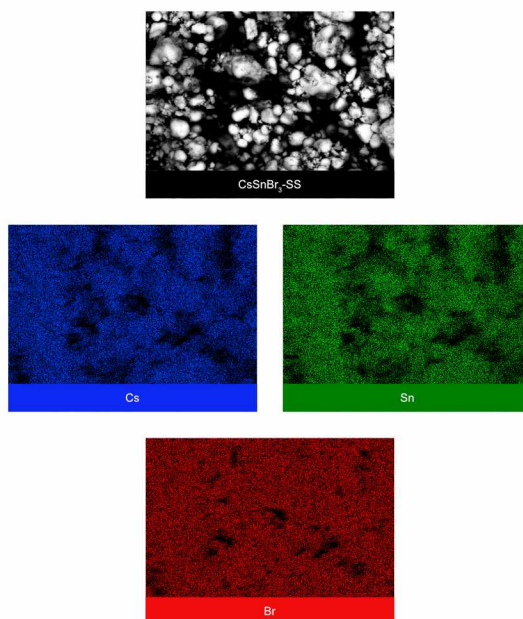

**Figure S2.** Elemental mapping of CsSnBr<sub>3</sub>-SS.

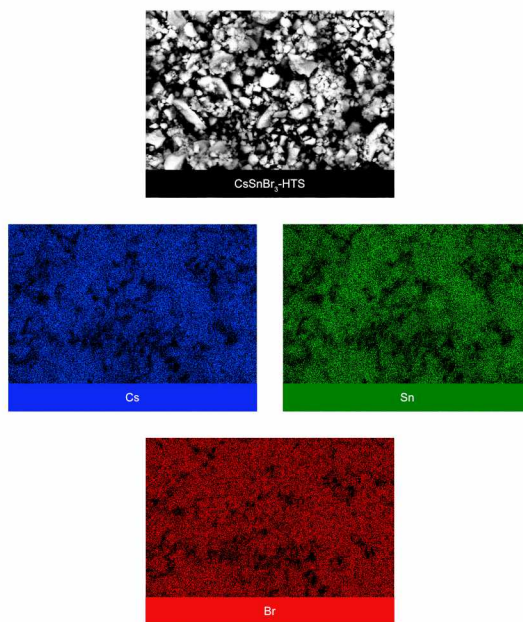

**Figure S3.** Elemental mapping of CsSnBr<sub>3</sub>-HTS.

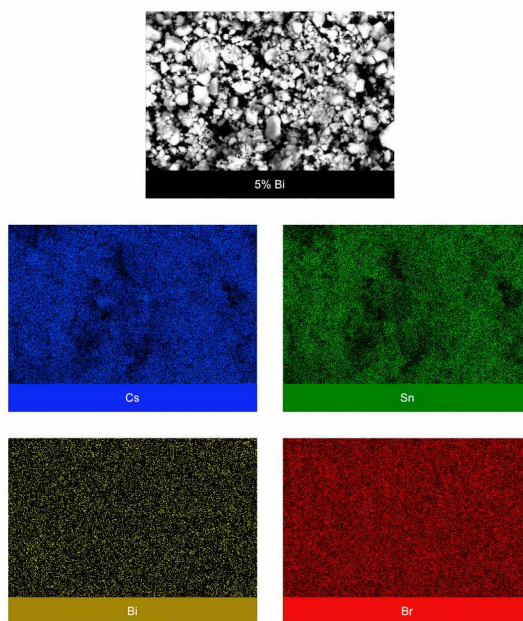

**Figure S4.** Elemental mapping of 5% Bi-substituted compound.

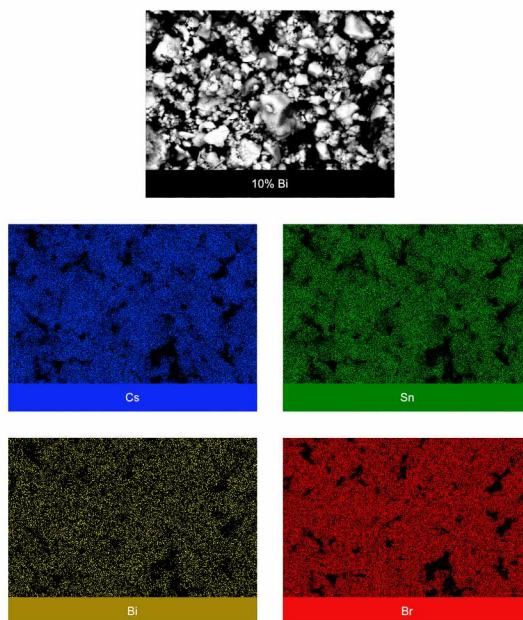

**Figure S5.** Elemental mapping of 10% Bi-substituted compound.

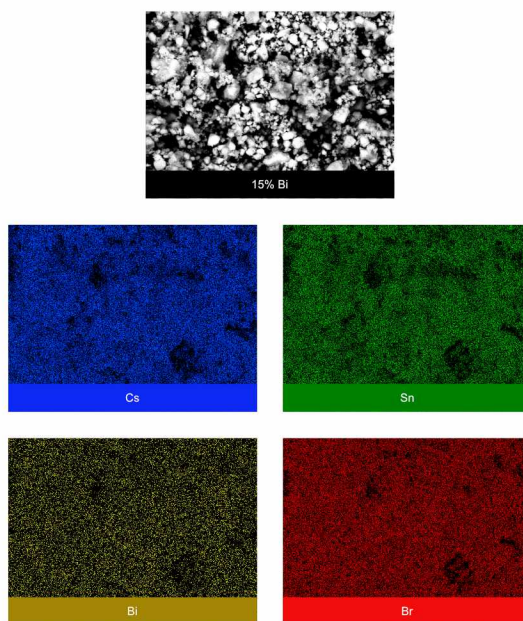

**Figure S6.** Elemental mapping of 15% Bi-substituted compound.

**Table S1.** Nominal compositions and EDX analyses of CsSnBr<sub>3</sub> and Bi-substituted compounds.

| Sample                   | Cs atom (%) |              | Sn atom (%) |              | Bi atom (%) |              | Br atom (%) |              |
|--------------------------|-------------|--------------|-------------|--------------|-------------|--------------|-------------|--------------|
|                          | Nominal     | EDX analysis | Nominal     | EDX analysis | Nominal     | EDX analysis | Nominal     | EDX analysis |
| CsSnBr <sub>3</sub> -SS  | 20          | 21           | 20          | 20           | 0           | 0            | 60          | 59           |
| CsSnBr <sub>3</sub> -HTS | 20          | 21           | 20          | 21           | 0           | 0            | 60          | 58           |
| 5%Bi                     | 19.8        | 20           | 18.81       | 17           | 0.99        | 1            | 60.4        | 62           |
| 10%Bi                    | 19.61       | 20           | 17.65       | 16           | 1.96        | 2            | 60.78       | 62           |
| 15%Bi                    | 19.42       | 20           | 16.5        | 15           | 2.91        | 3            | 61.17       | 62           |

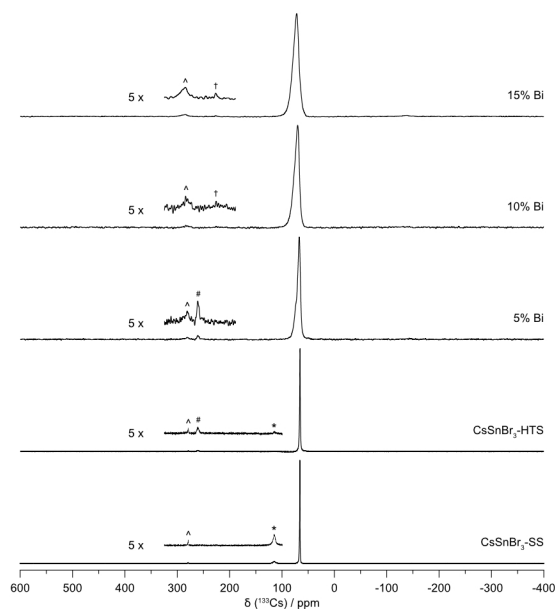**Figure S7.** <sup>133</sup>Cs MAS NMR spectra ( $B_0 = 11.75$  T,  $\omega_r/2\pi = 14$  kHz) for CsSnBr<sub>3</sub> and Bi-substituted samples. Trace secondary phases include Cs<sub>2</sub>SnBr<sub>6</sub> (asterisks, \*), CsBr (hash marks, #), and CsSn<sub>2</sub>Br<sub>5</sub> (daggers, †). Spinning side bands are marked by carets, ^.

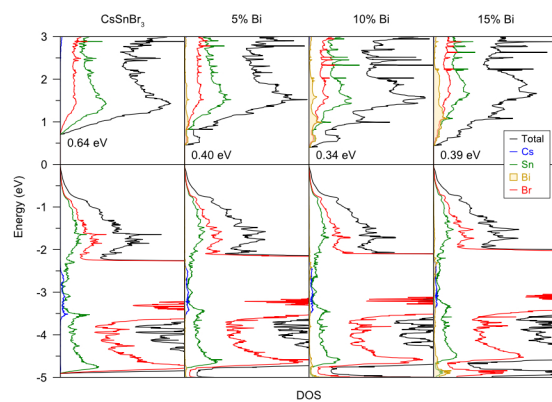

**Figure S8.** PBE DOS curves for  $\text{CsSnBr}_3$  and Bi-substituted models.

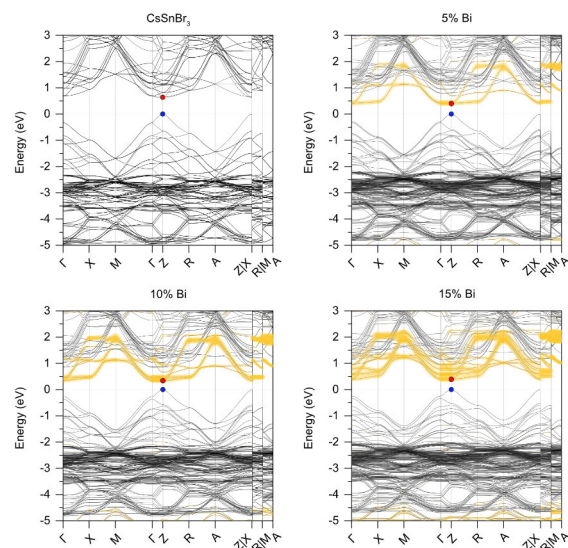

**Figure S9.** PBE band dispersion plots for  $\text{CsSnBr}_3$  and Bi-substituted models. The contributions of Bi-based states are highlighted in yellow. The valence band maxima are marked by blue circles and the conduction band minima by red circles.

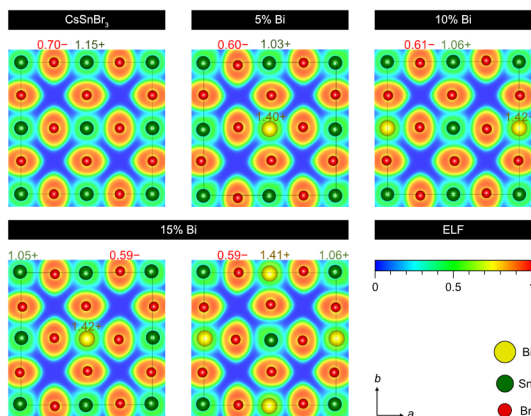

**Figure S10.** ELF plots and Bader charges for  $\text{CsSnBr}_3$  and Bi-substituted models, from calculations using HSE06 functionals.

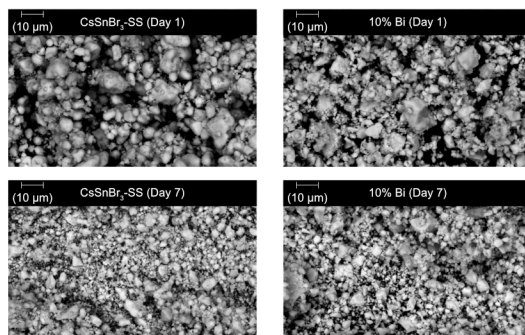

**Figure S11.** SEM images of  $\text{CsSnBr}_3$  and 10% Bi-substituted compound, before (Day 1) and after (Day 7) exposure to 65% relative humidity.



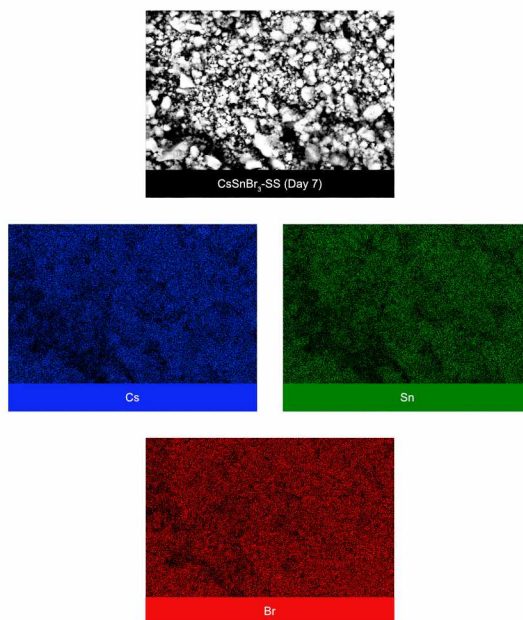

**Figure S12.** Elemental mapping of CsSnBr<sub>3</sub>-SS after exposure to 65% relative humidity (Day 7).

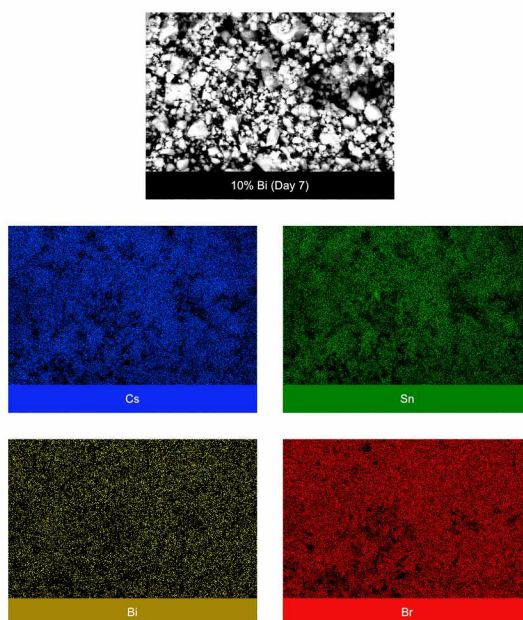

**Figure S13.** Elemental mapping of 10% Bi-substituted compound after exposure to 65% relative humidity (Day 7).
